# Supplementary material
Source: PubMed Central journal article supplement (PMC9764381)

# THE LANCET Psychiatry

## Supplementary appendix

This appendix formed part of the original submission and has been peer reviewed. We post it as supplied by the authors.

Supplement to: Pierce M, McManus S, Hope H, et al. Mental health responses to the COVID-19 pandemic: a latent class trajectory analysis using longitudinal UK data. *Lancet Psychiatry* 2021; published online May 6. [http://dx.doi.org/10.1016/S2215-0366\(21\)00151-6](http://dx.doi.org/10.1016/S2215-0366(21)00151-6).

## Different mental health responses to the COVID-19 pandemic: latent class trajectory analysis using longitudinal UK data: Supplementary Materials

Table S1: Sample characteristics by wave, unweighted and weighted percentages

| Characteristic        | Pre-pandemic |      |            | April 2020 |      |            | May 2020 |      |            | June 2020 |      |            | July 2020 |      |            | Sept 2020 |      |            |
|-----------------------|--------------|------|------------|------------|------|------------|----------|------|------------|-----------|------|------------|-----------|------|------------|-----------|------|------------|
|                       | N            | %    | % weighted | N          | %    | % weighted | N        | %    | % weighted | N         | %    | % weighted | N         | %    | % weighted | N         | %    | % weighted |
| All                   | 34,318       | 100  | 100        | 17,761     | 100  | 100        | 14,811   | 100  | 100        | 14,123    | 100  | 100        | 13,754    | 100  | 100        | 12,876    | 100  | 100        |
| Total GHQ score       |              |      |            |            |      |            |          |      |            |           |      |            |           |      |            |           |      |            |
| Mean                  |              | 11.4 | 11.5       |            | 12.5 | 12.7       |          | 12.3 | 12.8       |           | 12.4 | 12.9       |           | 11.7 | 12.1       |           | 11.8 | 12.1       |
| Skewness              |              | 1.12 |            |            | 1.21 |            |          | 1.33 |            |           | 1.34 |            |           | 1.54 |            |           | 1.54 |            |
| Kurtosis              |              | 4.40 |            |            | 4.66 |            |          | 5.04 |            |           | 5.05 |            |           | 5.97 |            |           | 6.01 |            |
| Gender                |              |      |            |            |      |            |          |      |            |           |      |            |           |      |            |           |      |            |
| Women                 | 18,934       | 55.2 | 52.3       | 10,334     | 58.2 | 52         | 8,699    | 58.7 | 52.5       | 8,308     | 58.8 | 52.8       | 8,032     | 58.4 | 51.8       | 7,532     | 58.5 | 52.8       |
| Men                   | 15,380       | 44.8 | 47.7       | 7,411      | 41.7 | 48         | 6,112    | 41.3 | 47.5       | 5,803     | 41.1 | 46.9       | 5,713     | 41.5 | 48.2       | 5,333     | 41.4 | 47.1       |
| Missing               | -            | 0.0  | 0.0        | -          | 0.0  | 0.0        | -        | 0.0  | 0.0        | 12        | 0.1  | 0.0        | 9         | 0.1  | 0.0        | 11        | 0.1  | 0.0        |
| Age-group             |              |      |            |            |      |            |          |      |            |           |      |            |           |      |            |           |      |            |
| 16-24                 | 4,143        | 12.1 | 13.6       | 1,578      | 8.9  | 10.5       | 986      | 6.7  | 10.2       | 887       | 6.3  | 10.3       | 864       | 6.3  | 9.6        | 663       | 5.1  | 9.4        |
| 25-34                 | 4,211        | 12.3 | 12.6       | 1,986      | 11.2 | 14         | 1,447    | 9.8  | 13.6       | 1,324     | 9.4  | 13.9       | 1,267     | 9.2  | 13.9       | 1,129     | 8.8  | 13.8       |
| 35-44                 | 5,211        | 15.2 | 13.8       | 2,825      | 15.9 | 14.9       | 2,205    | 14.9 | 15.7       | 2,045     | 14.5 | 15.2       | 1,977     | 14.4 | 15.7       | 1,779     | 13.8 | 15.7       |
| 45-54                 | 6,270        | 18.3 | 17.2       | 3,568      | 20.1 | 17.8       | 2,986    | 20.2 | 18.2       | 2,786     | 19.7 | 17.9       | 2,694     | 19.6 | 17.8       | 2,522     | 19.6 | 17.8       |
| 55-69                 | 8,384        | 24.4 | 24.2       | 5,113      | 28.8 | 25.9       | 4,636    | 31.3 | 26.4       | 4,552     | 32.2 | 26         | 4,468     | 32.5 | 26.3       | 4,329     | 33.6 | 26.5       |
| 70+                   | 6,097        | 17.8 | 18.6       | 2,691      | 15.2 | 16.9       | 2,551    | 17.2 | 16.1       | 2,529     | 17.9 | 16.8       | 2,484     | 18.1 | 16.8       | 2,454     | 19.1 | 16.9       |
| Ethnicity             |              |      |            |            |      |            |          |      |            |           |      |            |           |      |            |           |      |            |
| White British         | 26,587       | 77.5 | 88.3       | 14,220     | 80.1 | 87.5       | 12,213   | 82.5 | 87.1       | 11,729    | 83.0 | 87         | 11,344    | 82.5 | 87.4       | 10,767    | 83.6 | 87         |
| White other           | 1,510        | 4.4  | 4          | 792        | 4.5  | 3.7        | 656      | 4.4  | 3.7        | 633       | 4.5  | 3.8        | 598       | 4.3  | 3.5        | 566       | 4.4  | 3.4        |
| Mixed                 | 655          | 1.9  | 1.3        | 292        | 1.6  | 1.5        | 227      | 1.5  | 1.7        | 204       | 1.4  | 1.7        | 215       | 1.6  | 1.5        | 187       | 1.5  | 1.8        |
| Asian                 | 3,893        | 11.3 | 4.3        | 1,327      | 7.5  | 4.8        | 956      | 6.5  | 5.3        | 858       | 6.1  | 5.2        | 857       | 6.2  | 5.4        | 746       | 5.8  | 5.4        |
| Black                 | 1,313        | 3.8  | 1.7        | 413        | 2.3  | 1.8        | 295      | 2.0  | 1.7        | 274       | 1.9  | 1.6        | 286       | 2.1  | 1.6        | 250       | 1.9  | 1.7        |
| Other                 | 207          | 0.6  | 0.5        | 92         | 0.5  | 0.7        | 72       | 0.5  | 0.5        | 63        | 0.4  | 0.7        | 65        | 0.5  | 0.6        | 59        | 0.5  | 0.6        |
| Region of UK          |              |      |            |            |      |            |          |      |            |           |      |            |           |      |            |           |      |            |
| North East            | 1,187        | 3.5  | 4.2        | 605        | 3.4  | 4.2        | 528      | 3.6  | 4.2        | 498       | 3.5  | 4.1        | 470       | 3.4  | 4.1        | 460       | 3.6  | 4.2        |
| North West            | 3,570        | 10.4 | 11.3       | 1,740      | 9.8  | 10.8       | 1,419    | 9.6  | 11.2       | 1,357     | 9.6  | 10.7       | 1,335     | 9.7  | 10.7       | 1,255     | 9.7  | 10.6       |
| Yorkshire and the Hum | 3,067        | 8.9  | 9          | 1,507      | 8.5  | 8.8        | 1,239    | 8.4  | 8.4        | 1,183     | 8.4  | 8.5        | 1,150     | 8.4  | 8.7        | 1,078     | 8.4  | 8.7        |
| East Mid              | 2,425        | 7.1  | 7.6        | 1,355      | 7.6  | 7.7        | 1,125    | 7.6  | 7.9        | 1,095     | 7.8  | 8.2        | 1,070     | 7.8  | 8          | 1,020     | 7.9  | 8.1        |
| West Mids             | 2,952        | 8.6  | 8.7        | 1,508      | 8.5  | 9          | 1,279    | 8.6  | 8.7        | 1,202     | 8.5  | 8.7        | 1,181     | 8.6  | 8.6        | 1,089     | 8.5  | 8.8        |

|                                        |        |      |      |        |      |      |        |      |       |        |      |       |        |      |       |        |      |      |
|----------------------------------------|--------|------|------|--------|------|------|--------|------|-------|--------|------|-------|--------|------|-------|--------|------|------|
| East of England                        | 2,943  | 8.6  | 9.7  | 1,716  | 9.7  | 10.1 | 1,465  | 9.9  | 10.2  | 1,386  | 9.8  | 10.3  | 1,329  | 9.7  | 10.4  | 1,281  | 9.9  | 10.2 |
| London                                 | 4,193  | 12.2 | 11   | 1,920  | 10.8 | 11.6 | 1,487  | 10.0 | 11.3  | 1,348  | 9.5  | 11.2  | 1,357  | 9.9  | 11.5  | 1,201  | 9.3  | 11.4 |
| South East                             | 3,989  | 11.6 | 14   | 2,458  | 13.8 | 14.3 | 2,085  | 14.1 | 14.6  | 2,004  | 14.2 | 14.4  | 1,938  | 14.1 | 14.1  | 1,817  | 14.1 | 14.2 |
| South West                             | 2,717  | 7.9  | 9    | 1,616  | 9.1  | 9.1  | 1,389  | 9.4  | 8.7   | 1,350  | 9.6  | 8.6   | 1,295  | 9.4  | 8.7   | 1,242  | 9.6  | 8.7  |
| Wales                                  | 2,164  | 6.3  | 4.6  | 1,041  | 5.9  | 4.6  | 883    | 6.0  | 4.8   | 846    | 6.0  | 4.7   | 826    | 6.0  | 4.6   | 751    | 5.8  | 4.5  |
| Scotland                               | 2,847  | 8.3  | 8.2  | 1,541  | 8.7  | 7.7  | 1,292  | 8.7  | 7.6   | 1,252  | 8.9  | 8     | 1,201  | 8.7  | 7.7   | 1,140  | 8.9  | 7.7  |
| Northern Ireland                       | 2,240  | 6.5  | 2.7  | 753    | 4.2  | 2.4  | 616    | 4.2  | 2.4   | 600    | 4.2  | 2.6   | 600    | 4.4  | 3     | 539    | 4.2  | 2.8  |
| Age of youngest child in household     |        |      |      |        |      |      |        |      |       |        |      |       |        |      |       |        |      |      |
| None                                   | 23,507 | 68.5 | 72.8 | 12,442 | 70.1 | 72.6 | 10,879 | 73.5 | 73.4  | 10,540 | 74.6 | 74    | 10,249 | 74.5 | 73.3  | 9,758  | 75.8 | 73.9 |
| <6 years                               | 4,072  | 11.9 | 10.7 | 1,789  | 10.1 | 9    | 1,221  | 8.2  | 8     | 1,101  | 7.8  | 7.9   | 1,051  | 7.6  | 8.4   | 940    | 7.3  | 7.9  |
| 6-15 years                             | 6,009  | 17.5 | 16.6 | 3,530  | 19.9 | 18.4 | 2,711  | 18.3 | 18.6  | 2,482  | 17.6 | 18.2  | 2,454  | 17.8 | 18.3  | 2,178  | 16.9 | 18.2 |
| Lives with partner                     |        |      |      |        |      |      |        |      |       |        |      |       |        |      |       |        |      |      |
| Yes                                    | 21,187 | 61.7 | 57.9 | 12,532 | 70.6 | 63.3 | 10,309 | 69.6 | 61.6  | 9,883  | 70.0 | 61.6  | 9,592  | 69.7 | 61.9  | 9,083  | 70.5 | 62.0 |
| No                                     | 13,131 | 38.3 | 42.1 | 5,229  | 29.4 | 36.7 | 4,502  | 30.4 | 38.4  | 4,240  | 30.0 | 38.4  | 4,162  | 30.3 | 38.1  | 3,793  | 29.5 | 38.0 |
| Keyworker                              |        |      |      |        |      |      |        |      |       |        |      |       |        |      |       |        |      |      |
| Yes                                    | NA     |      |      | 4,583  | 25.8 | 25   | 4,140  | 28.0 | 27.7  | 3,906  | 27.7 | 27.3  | 122    | 0.9  | 1.2*  | 16     | 0.1  | 0.2* |
| No                                     | NA     |      |      | 13,169 | 74.1 | 75   | 10,657 | 72.0 | 72.3  | 10,211 | 72.3 | 72.7  | 13,629 | 99.1 | 98.8  | 12,860 | 99.9 | 99.8 |
| NHS shielding letter received          |        |      |      |        |      |      |        |      |       |        |      |       |        |      |       |        |      |      |
| Yes                                    | NA     |      |      | 1,031  | 5.8  | 7.7  | 137    | 9.6  | 10.9* | 43     | 7.8  | 10.5* | 52     | 10.1 | 18.3* | 11     | 15.3 | 9.6* |
| No                                     | NA     |      |      | 16,724 | 94.2 | 92.4 | 1,291  | 90.4 | 89.1  | 508    | 92.2 | 89.5  | 464    | 89.9 | 81.7  | 61     | 84.7 | 90.5 |
| Index of Multiple Deprivation quintile |        |      |      |        |      |      |        |      |       |        |      |       |        |      |       |        |      |      |
| Most deprived                          | NA     |      |      | 2,154  | 12.1 | 17.7 | 1,641  | 11.1 | 17.2  | 1,505  | 10.7 | 16.3  | 1,513  | 11.0 | 17.7  | 1,359  | 10.6 | 17   |
| 2 <sup>nd</sup>                        | NA     |      |      | 2,607  | 14.7 | 19.6 | 2,157  | 14.6 | 19.3  | 2,017  | 14.3 | 20    | 2,000  | 14.5 | 20.2  | 1,857  | 14.4 | 20.3 |
| 3 <sup>rd</sup>                        | NA     |      |      | 2,864  | 16.1 | 19.1 | 2,414  | 16.3 | 19.1  | 2,313  | 16.4 | 19.5  | 2,227  | 16.2 | 18.6  | 2,107  | 16.4 | 18.8 |
| 4 <sup>th</sup>                        | NA     |      |      | 3,351  | 18.9 | 22.7 | 2,828  | 19.1 | 22.5  | 2,713  | 19.2 | 22.3  | 2,630  | 19.1 | 22    | 2,517  | 19.5 | 22.1 |
| Least                                  | NA     |      |      | 3,418  | 19.2 | 20.9 | 2,976  | 20.1 | 21.9  | 2,874  | 20.3 | 22    | 2,755  | 20.0 | 21.6  | 2,603  | 20.2 | 21.9 |
| Prior mental illness                   |        |      |      |        |      |      |        |      |       |        |      |       |        |      |       |        |      |      |
| Yes                                    | 2,081  | 6.1  | 6.7  | NA     |      |      | NA     |      |       | NA     |      |       | NA     |      |       | NA     |      |      |
| No                                     | 32,237 | 93.9 | 93.3 | NA     |      |      | NA     |      |       | NA     |      |       | NA     |      |       | NA     |      |      |

|                         |        |      |      |        |      |      |        |      |      |        |      |      |        |      |      |        |      |      |
|-------------------------|--------|------|------|--------|------|------|--------|------|------|--------|------|------|--------|------|------|--------|------|------|
| SAR-CoV-2 infection     |        |      |      |        |      |      |        |      |      |        |      |      |        |      |      |        |      |      |
| Not suspected           | NA     |      |      | 15,520 | 87.4 | 88.3 | 14,264 | 96.3 | 96.4 | 13,769 | 97.5 | 97.6 | 13,448 | 97.8 | 97.6 | 12,409 | 96.4 | 96.1 |
| Suspected               | NA     |      |      | 2,203  | 12.4 | 11.6 | 517    | 3.5  | 3.5  | 319    | 2.3  | 2.2  | 288    | 2.1  | 2.2  | 438    | 3.4  | 3.7  |
| Confirmed               | NA     |      |      | 30     | 0.2  | 0.1  | 27     | 0.2  | 0.2  | 31     | 0.2  | 0.1  | 11     | 0.1  | 0.2  | 22     | 0.2  | 0.2  |
| Local lockdown measures |        |      |      |        |      |      |        |      |      |        |      |      |        |      |      |        |      |      |
| Yes                     | NA     |      |      | NA     |      |      | NA     |      |      | NA     |      |      | 13,658 | 99.3 | 99.3 | 10,985 | 85.3 | 85.3 |
| No                      | NA     |      |      | NA     |      |      | NA     |      |      | NA     |      |      | 96     | 0.7  | 0.7  | 1,891  | 14.7 | 14.8 |
| Problem paying bills    |        |      |      |        |      |      |        |      |      |        |      |      |        |      |      |        |      |      |
| Yes                     | 31,533 | 5.6  | 5.7  | 15,662 | 5.0  | 6.1  | 13,838 | 4.7  | 7.2  | NA     |      |      | 12,877 | 4.5  | 6.6  | NA     |      |      |
| No                      | 1,920  | 91.9 | 91.9 | 884    | 88.2 | 86.7 | 695    | 93.4 | 90.5 | NA     |      |      | 623    | 93.6 | 91.4 | NA     |      |      |
| Missing                 | 865    | 2.5  | 2.5  | 1,215  | 6.8  | 7.3  | 278    | 1.9  | 2.3  |        |      |      | 254    | 1.9  | 2.0  |        |      |      |

Numbers in brackets are percentages, accounting for survey weights and clustered, stratified design.

NA = data not collected

\*Only asked if they had not responded to prior waves

Table S2: Patterns of non-response for 19,763 respondents to the UKHLS COVID-19 web-survey

| Variable                    | N      | %    |
|-----------------------------|--------|------|
| Missing at each wave        |        |      |
| Wave 1                      | 2,002  | 10.1 |
| Wave 2                      | 4,952  | 25.1 |
| Wave 3                      | 5,640  | 28.5 |
| Wave 4                      | 6,009  | 30.4 |
| Wave 5                      | 6,887  | 34.8 |
| Missing for number of waves |        |      |
| No waves                    | 10,541 | 53.3 |
| 1 wave only                 | 2,278  | 11.5 |
| 2 waves                     | 1,407  | 7.1  |
| 3 waves                     | 1,750  | 8.9  |
| 4 waves                     | 3,787  | 19.2 |
| Patterns of non-response    |        |      |
| All complete                | 10,541 | 53.3 |
| Wave 5 only                 | 917    | 4.6  |
| Wave 4 only                 | 486    | 2.5  |
| Waves 4 & 5                 | 493    | 2.5  |
| Wave 3 only                 | 298    | 1.5  |
| Waves 3 & 5                 | 179    | 0.9  |
| Waves 3 & 4                 | 160    | 0.8  |
| Waves 3, 4 & 5              | 624    | 3.2  |
| Wave 2 only                 | 261    | 1.3  |
| Waves 2 & 5                 | 127    | 0.6  |
| Waves 2 & 4                 | 82     | 0.4  |
| Waves 2, 4 & 5              | 221    | 1.1  |
| Waves 2 & 3                 | 120    | 0.6  |
| Waves 2, 3 & 5              | 237    | 1.2  |
| Waves 2, 3 & 4              | 221    | 1.1  |
| Waves 2, 3, 4 & 5           | 2,794  | 14.1 |
| Wave 1 only                 | 316    | 1.6  |
| Waves 1 & 5                 | 80     | 0.4  |
| Waves 1 & 4                 | 44     | 0.2  |
| Waves 1, 4 & 5              | 98     | 0.5  |
| Waves 1 & 3                 | 42     | 0.2  |
| Waves 1 & 3 & 5             | 54     | 0.3  |
| Waves 1, 3 & 4              | 48     | 0.2  |
| Waves 1, 3, 4 & 5           | 431    | 2.2  |
| Waves 1 & 2                 | 80     | 0.4  |
| Waves 1, 2 & 5              | 70     | 0.4  |
| Waves, 1, 2 & 4             | 51     | 0.3  |
| Waves 1, 2, 4 & 5           | 256    | 1.3  |
| Waves 1, 2 & 3              | 126    | 0.6  |
| Waves 1, 2, 3 & 5           | 306    | 1.6  |

Table S3: Characteristics of sample with all missing outcome data

| Variable        | Missing GHQ-12 for all waves | %    | Complete for at least one wave | %    | p-value  |
|-----------------|------------------------------|------|--------------------------------|------|----------|
| All             | 1,442                        | 100  | 18,321                         | 100  |          |
| Gender          |                              |      |                                |      | 0.408    |
| Male            | 619                          | 43.0 | 7,665                          | 41.8 |          |
| Female          | 822                          | 57.0 | 10,655                         | 58.2 |          |
| Age-group       |                              |      |                                |      | P<0.0001 |
| 16-24           | 311                          | 21.6 | 1,474                          | 8.0  |          |
| 25-34           | 256                          | 17.8 | 1,968                          | 10.7 |          |
| 35-44           | 328                          | 22.8 | 2,788                          | 15.2 |          |
| 45-54           | 268                          | 18.6 | 3,687                          | 20.1 |          |
| 55-69           | 216                          | 15.0 | 5,419                          | 29.6 |          |
| 70+             | 63                           | 4.4  | 2,985                          | 16.3 |          |
| IMD quintile    |                              |      |                                |      | P<0.0001 |
| Most deprived   | 307                          | 25.6 | 2,215                          | 15.0 |          |
| 2 <sup>nd</sup> | 256                          | 21.3 | 2,670                          | 18.1 |          |
| 3 <sup>rd</sup> | 210                          | 17.5 | 2,940                          | 19.9 |          |
| 4 <sup>th</sup> | 222                          | 18.5 | 3,427                          | 23.2 |          |
| Least           | 205                          | 17.1 | 3,526                          | 23.9 |          |

**Table S4 local lockdown restrictions in England by local authority**

| <b>Local authority</b> | <b>Date restrictions began</b> | <b>Date restrictions ended</b> |
|------------------------|--------------------------------|--------------------------------|
| Calderdale             | 05/08/2020                     | 14/10/2020                     |
| Blackburn with Darwen  | 25/07/2020                     | 14/10/2020                     |
| Bolton                 | 05/08/2020                     | 14/10/2020                     |
| Bradford               | 01/08/2020                     | 14/10/2020                     |
| Birmingham             | 15/09/2020                     | 14/10/2020                     |
| Burnley                | 05/08/2020                     | 14/10/2020                     |
| Bury                   | 05/08/2020                     | 14/10/2020                     |
| Chorley                | 22/09/2020                     | 14/10/2020                     |
| County Durham          | 18/09/2020                     | 14/10/2020                     |
| Fylde                  | 22/09/2020                     | 14/10/2020                     |
| Gateshead              | 18/09/2020                     | 14/10/2020                     |
| Halton                 | 22/09/2020                     | 14/10/2020                     |
| Hyndburn               | 05/08/2020                     | 14/10/2020                     |
| Kirklees               | 05/08/2020                     | 14/10/2020                     |
| Knowsley               | 22/09/2020                     | 14/10/2020                     |
| Lancaster              | 22/09/2020                     | 14/10/2020                     |
| Leicester              | 04/07/2020                     | 14/10/2020                     |
| Liverpool              | 22/09/2020                     | 14/10/2020                     |
| Luton                  | 25/07/2020                     | 01/08/2020                     |
| Manchester             | 05/08/2020                     | 14/10/2020                     |
| Newcastle upon Tyne    | 18/09/2020                     | 14/10/2020                     |
| North Tyneside         | 18/09/2020                     | 14/10/2020                     |
| Northumberland         | 18/09/2020                     | 14/10/2020                     |
| Oldham                 | 05/08/2020                     | 14/10/2020                     |
| Pendle                 | 05/08/2020                     | 14/10/2020                     |
| Preston                | 22/09/2020                     | 14/10/2020                     |
| Ribble Valley          | 22/09/2020                     | 14/10/2020                     |
| Rochdale               | 05/08/2020                     | 14/10/2020                     |
| Rossendale             | 05/08/2020                     | 14/10/2020                     |
| Salford                | 05/08/2020                     | 14/10/2020                     |
| Sandwell               | 15/09/2020                     | 14/10/2020                     |
| Sefton                 | 22/09/2020                     | 14/10/2020                     |
| Solihull               | 15/09/2020                     | 14/10/2020                     |
| South Ribble           | 22/09/2020                     | 14/10/2020                     |
| South Tyneside         | 18/09/2020                     | 14/10/2020                     |
| St. Helens             | 22/09/2020                     | 14/10/2020                     |
| Stockport              | 05/08/2020                     | 14/10/2020                     |
| Sunderland             | 18/09/2020                     | 14/10/2020                     |
| Tameside               | 05/08/2020                     | 14/10/2020                     |
| Trafford               | 05/08/2020                     | 14/10/2020                     |
| Warrington             | 22/09/2020                     | 14/10/2020                     |
| West Lancashire        | 22/09/2020                     | 14/10/2020                     |
| Wigan                  | 05/08/2020                     | 14/10/2020                     |
| Wirral                 | 22/09/2020                     | 14/10/2020                     |

Description of pandemic containment measures in the UK context:

The UK entered a national lockdown when the Health Protection (Coronavirus, Restrictions) Regulations 2020 came into force on 26<sup>th</sup> March. This shut schools and all but essential services and mandated people work from home. These statutory laws restricted movement and confined people to their homes, exceptions included to care for a relative, or to take exercise.

Some of these national restrictions began to relax from May onwards: May 10<sup>th</sup> people could exercise outside for as long as they wanted and people were urged to return to work if necessary; June 15<sup>th</sup> non-essential shops reopened; and 4<sup>th</sup> July, dubbed “super Saturday” bars, pubs and restaurants reopened with social distancing measures in place. Against this background of increasing freedom nationally, in England, local areas with rises in SARS-CoV-2 infections were asked to put restrictions in place. Generally these applied to local authority areas (small-area units with average population of 177 thousand), but in effect these often covered whole conurbations (e.g. Greater Manchester, population 2.8 Million) or larger regions.

Leicester entered the first local lockdown on 4<sup>th</sup> July, where only essential services and shops remained open, people worked from home and residents could not move outside of the authority border. Luton and local authorities in the North West (e.g. Calderdale, Blackburn with Darwen and Oldham) had local lockdown restrictions put into place by the 8<sup>th</sup> August 2020. Of the local authorities listed in the table adjacent, only Luton had restrictions lifted prior to the commencement of a new national system.

Compared to the rest of the country these areas remained in lockdown, however September saw some restrictions lifted; schools first, then gyms and swimming pools reopened with social distancing measures in place.





Table S5: Guidelines for Reporting on Latent Trajectory Studies (GRoLTS) checklist

|                                                                                                                                                                                                                                                         |                                                                                                                        |
|---------------------------------------------------------------------------------------------------------------------------------------------------------------------------------------------------------------------------------------------------------|------------------------------------------------------------------------------------------------------------------------|
| 1. Is the metric of time used in the statistical model reported?                                                                                                                                                                                        | Methods                                                                                                                |
| 2. Is information presented about the mean and variance of time within a wave?                                                                                                                                                                          | We have reported that each wave took place over the course of a week. We believe this provides sufficient information. |
| 3a. Is the missing data mechanism reported?                                                                                                                                                                                                             | Table S2                                                                                                               |
| 3b. Is a description provided of what variables are related to attrition/missing data?                                                                                                                                                                  | Table S3                                                                                                               |
| 3c. Is a description provided of how missing data in the analyses were dealt with?                                                                                                                                                                      | Methods                                                                                                                |
| 4. Is information about the distribution of the observed variables included?                                                                                                                                                                            | Table S1                                                                                                               |
| 5. Is the software mentioned?                                                                                                                                                                                                                           | Methods                                                                                                                |
| 6a. Are alternative specifications of within-class heterogeneity considered (e.g., LGCA vs. LGMM) and clearly documented? If not, was sufficient justification provided as to eliminate certain specifications from consideration?                      | Yes we had considered using LGCA                                                                                       |
| 6b. Are alternative specifications of the between-class differences in variance-covariance matrix structure considered and clearly documented? If not, was sufficient justification provided as to eliminate certain specifications from consideration? | This was not an option in the available software                                                                       |
| 7. Are alternative shape/functional forms of the trajectories described?                                                                                                                                                                                | Yes                                                                                                                    |
| 8. If covariates have been used, can analyses still be replicated?                                                                                                                                                                                      | NA                                                                                                                     |
| 9. Is information reported about the number of random start values and final iterations included?                                                                                                                                                       | Methods                                                                                                                |
| 10. Are the model comparison (and selection) tools described from a statistical perspective?                                                                                                                                                            | Methods                                                                                                                |
| 11. Are the total number of fitted models reported, including a one-class solution?                                                                                                                                                                     | Appendix page 8                                                                                                        |
| 12. Are the number of cases per class reported for each model (absolute sample size, or proportion)?                                                                                                                                                    | Appendix page 8                                                                                                        |
| 13. If classification of cases in a trajectory is the goal, is entropy reported?                                                                                                                                                                        | Appendix page 8                                                                                                        |
| 14a. Is a plot included with the estimated mean trajectories of the final solution?                                                                                                                                                                     | Appendix pages 8-9                                                                                                     |
| 14b. Are plots included with the estimated mean trajectories for each model?                                                                                                                                                                            | Appendix pages 8-9                                                                                                     |
| 14c. Is a plot included of the combination of estimated means of the final model and the observed individual trajectories split out for each latent class?                                                                                              | These are presented in separate plots, appendix pages 8-9                                                              |
| 15. Are characteristics of the final class solution numerically described (i.e., means, SD/SE, n, CI, etc.)?                                                                                                                                            | Yes                                                                                                                    |
| 16. Are the syntax files available (either in the appendix, supplementary materials, or from the authors)?                                                                                                                                              | Available from authors on request                                                                                      |

## Further detail on latent class trajectory modelling

Table S6: Fit statistics for 1 to 7 class models

| Model   | BIC      | Sample size adjusted BIC | aVLMR           | Entropy | Proportion in each group (%)*       |
|---------|----------|--------------------------|-----------------|---------|-------------------------------------|
| 1-class | 330298.4 | 330285.7                 | -               | -       | 100                                 |
| 2-class | 305098.9 | 305079.9                 | 24415.6/p<0.001 | 0.92    | 15.8, 84.2                          |
| 3-class | 296779.6 | 296751.0                 | 6580.7/p<0.001  | 0.82    | 28.7, 6.8, 64.5                     |
| 4-class | 292633.2 | 292595.1                 | 4043.5/p<0.001  | 0.74    | 40.2, 13.3, 3.7, 42.8               |
| 5-class | 290308.2 | 290260.5                 | 2280.3/p<0.001  | 0.73    | 40.6, 9.3, 2.8, 5.3, 42.0           |
| 6-class | 288474.5 | 288417.3                 | 1804.6/p<0.001  | 0.70    | 40.0, 14.1, 1.7, 4.4, 2.9, 36.9     |
| 7-class | 287319.5 | 287252.8                 | 1147.6/p<0.001  | 0.67    | 40.4, 7.6, 1.6, 3.7, 2.5, 7.4, 36.8 |

\*from unweighted data.

Graphs for each model: spaghetti plots using a random subset of 1000 participants and predicted trajectories by latent class group membership.

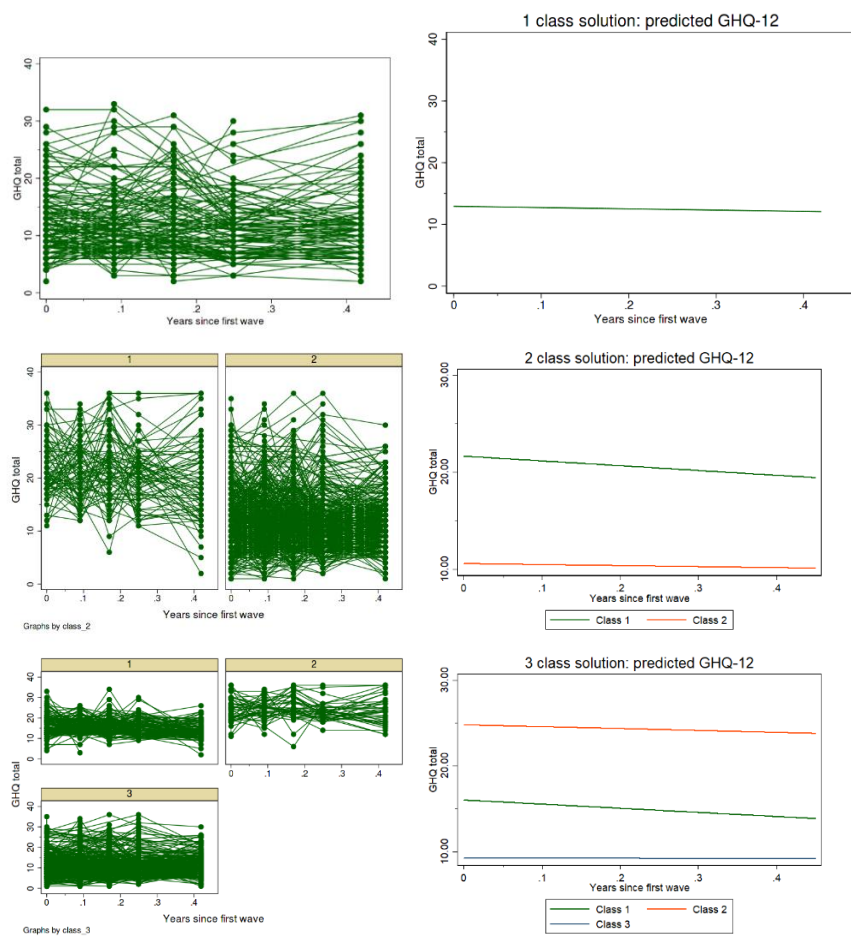

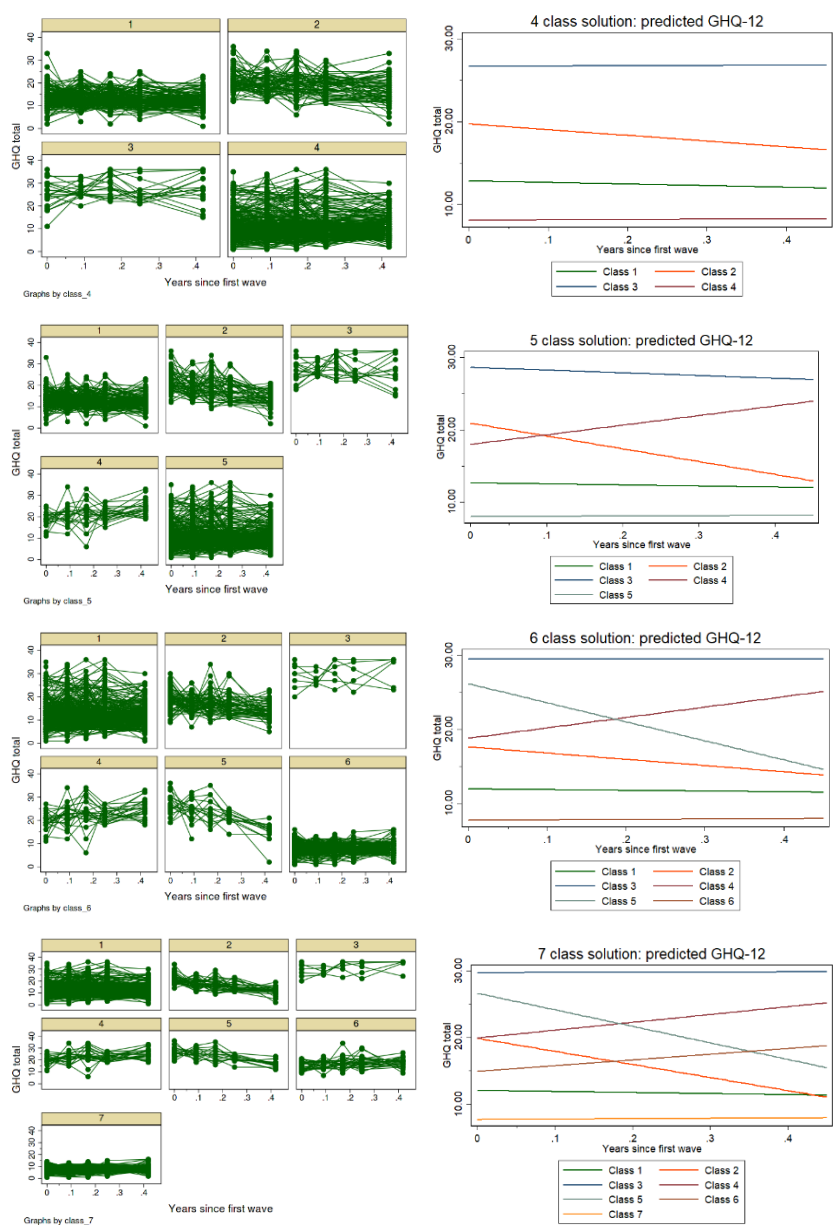

### Estimates from 5 class solution

| Variable       | Est     | SE    |
|----------------|---------|-------|
| Baseline       |         |       |
| Constant       | 12.511  | 0.059 |
| Date           | -1.488  | 0.172 |
| Latent class 2 |         |       |
| Constant       | 8.695   | 0.510 |
| Date           | -16.206 | 1.542 |
| Latent class 3 |         |       |
| Constant       | 16.382  | 0.756 |
| Date           | -2.267  | 2.397 |
| Latent class 4 |         |       |
| Constant       | 5.760   | 0.802 |
| Date           | 14.747  | 1.731 |
| Latent class 5 |         |       |

|                     |        |       |
|---------------------|--------|-------|
| Constant            | -2.511 | 0.643 |
| Date                | 0.011  | 0.330 |
| Random intercept SD | 1.250  | 0.011 |

Table S7: Relative rate ratios and 95% confidence intervals from multinomial logistic regression comparing membership of being in the very good latent class compared to other classes associated with covariates

| Characteristic                         | Latent class group                         |                                       |                              |                                   |                                          |
|----------------------------------------|--------------------------------------------|---------------------------------------|------------------------------|-----------------------------------|------------------------------------------|
|                                        | Consistently very good<br>(n=7,623, 37.5%) | Consistently good<br>(n=7,437, 39.3%) | Recovery<br>(n=1,727, 12.0%) | Deteriorating<br>(n= 1,011, 7.0%) | Consistently very poor<br>(n= 523, 4.1%) |
| Gender                                 |                                            |                                       |                              |                                   |                                          |
| Women                                  | Ref                                        | 1.61 [1.39, 1.85]                     | 2.23 [1.73, 2.86]            | 1.66 [1.23, 2.25]                 | 2.27 [1.52, 3.39]                        |
| Men                                    | Ref                                        | Ref                                   | Ref                          | Ref                               | Ref                                      |
| Age-group                              |                                            |                                       |                              |                                   |                                          |
| 16-24                                  | Ref                                        | 1.36 [0.96, 1.93]                     | 1.33 [0.84, 2.10]            | 1.77 [0.99, 3.14]                 | 1.42 [0.72, 2.82]                        |
| 25-34                                  | Ref                                        | 1.15 [0.86, 1.53]                     | 1.48 [0.93, 2.37]            | 1.80 [1.10, 2.96]                 | 1.30 [0.73, 2.34]                        |
| 35-44                                  | Ref                                        | Ref                                   | Ref                          | Ref                               | Ref                                      |
| 45-54                                  | Ref                                        | 0.75 [0.61, 0.93]                     | 0.57 [0.39, 0.82]            | 0.84 [0.55, 1.28]                 | 0.82 [0.45, 1.49]                        |
| 55-69                                  | Ref                                        | 0.68 [0.55, 0.84]                     | 0.41 [0.29, 0.57]            | 0.60 [0.39, 0.91]                 | 0.46 [0.29, 0.71]                        |
| 70+                                    | Ref                                        | 0.52 [0.41, 0.67]                     | 0.28 [0.17, 0.44]            | 0.34 [0.20, 0.60]                 | 0.13 [0.07, 0.23]                        |
| Ethnicity                              |                                            |                                       |                              |                                   |                                          |
| White British                          | Ref                                        | Ref                                   | Ref                          | Ref                               | Ref                                      |
| Other White                            | Ref                                        | 0.99 [0.63, 1.55]                     | 0.74 [0.37, 1.46]            | 0.82 [0.42, 1.60]                 | 0.76 [0.34, 1.69]                        |
| Mixed                                  | Ref                                        | 1.37 [0.64, 2.92]                     | 1.94 [0.61, 6.12]            | 1.43 [0.54, 3.73]                 | 8.62 [2.79, 26.60]                       |
| Asian                                  | Ref                                        | 1.19 [0.89, 1.61]                     | 1.83 [1.04, 3.22]            | 2.41 [1.14, 5.08]                 | 1.43 [0.76, 2.69]                        |
| Black                                  | Ref                                        | 0.50 [0.22, 1.16]                     | 0.34 [0.11, 1.03]            | 1.04 [0.36, 3.02]                 | 1.87 [0.34, 10.22]                       |
| Other                                  | Ref                                        | 0.54 [0.21, 1.37]                     | 3.45 [1.49, 7.97]            | 0.58 [0.08, 4.47]                 | 0.35 [0.04, 2.72]                        |
| Age of youngest child in household     |                                            |                                       |                              |                                   |                                          |
| None                                   | Ref                                        | Ref                                   | Ref                          | Ref                               | Ref                                      |
| <6 years                               | Ref                                        | 1.25 [0.96, 1.63]                     | 1.92 [1.24, 2.98]            | 1.23 [0.79, 1.93]                 | 1.17 [0.72, 1.90]                        |
| 6-15 years                             | Ref                                        | 1.06 [0.88, 1.27]                     | 1.38 [1.02, 1.87]            | 1.30 [0.88, 1.92]                 | 1.39 [0.88, 2.19]                        |
| Lives with partner                     |                                            |                                       |                              |                                   |                                          |
| Yes                                    | Ref                                        | 0.72 [0.61, 0.85]                     | 0.43 [0.33, 0.55]            | 0.37 [0.27, 0.50]                 | 0.24 [0.17, 0.35]                        |
| No                                     | Ref                                        | Ref                                   | Ref                          | Ref                               | Ref                                      |
| Keyworker                              |                                            |                                       |                              |                                   |                                          |
| Yes                                    | Ref                                        | 1.23 [1.06, 1.43]                     | 0.95 [0.73, 1.22]            | 1.15 [0.85, 1.57]                 | 0.99 [0.64, 1.51]                        |
| No                                     | Ref                                        | Ref                                   | Ref                          | Ref                               | Ref                                      |
| NHS shielding letter received          |                                            |                                       |                              |                                   |                                          |
| Yes                                    | Ref                                        | 1.03 [0.75, 1.42]                     | 1.53 [0.89, 2.65]            | 1.84 [0.93, 3.62]                 | 2.70 [1.31, 5.54]                        |
| No                                     | Ref                                        | Ref                                   | Ref                          | Ref                               | Ref                                      |
| Index of Multiple Deprivation quintile |                                            |                                       |                              |                                   |                                          |
| Most deprived                          | Ref                                        | 1.28 [0.96, 1.72]                     | 2.32 [1.60, 3.38]            | 2.36 [1.40, 3.99]                 | 5.56 [3.12, 9.91]                        |
| 2nd                                    | Ref                                        | 1.03 [0.81, 1.31]                     | 1.66 [1.18, 2.36]            | 1.57 [1.01, 2.45]                 | 2.44 [1.26, 4.75]                        |
| 3rd                                    | Ref                                        | 1.11 [0.90, 1.38]                     | 1.58 [1.09, 2.29]            | 1.16 [0.70, 1.92]                 | 1.81 [0.99, 3.31]                        |
| 4th                                    | Ref                                        | 0.86 [0.70, 1.07]                     | 1.33 [0.89, 1.98]            | 1.24 [0.77, 1.99]                 | 1.29 [0.72, 2.29]                        |
| Least deprived                         | Ref                                        | Ref                                   | Ref                          | Ref                               | Ref                                      |
| Prior mental illness                   |                                            |                                       |                              |                                   |                                          |
| Yes                                    | Ref                                        | 2.64 [1.85, 3.79]                     | 5.01 [3.40, 7.38]            | 4.79 [2.96, 7.76]                 | 8.67 [5.42, 13.85]                       |
| No                                     | Ref                                        | Ref                                   | Ref                          | Ref                               | Ref                                      |

Table S8: Repeating fixed effect model on augmented version of the GHQ-12 (excluding the question: ‘Have you recently been able to enjoy your normal day-to-day activities?’)

|                            | Change in GHQ-12* [95% CI] |            |
|----------------------------|----------------------------|------------|
| Variable                   |                            |            |
| Having a local lockdown    | 0.21                       | 0.00, 0.42 |
|                            |                            |            |
| SAR-CoV-2 infection status |                            |            |
| Not suspected              | REF                        |            |
| Suspected                  | 0.23                       | 0.06, 0.40 |
| Confirmed                  | 1.90                       | 0.94, 2.85 |
|                            |                            |            |
| Problems paying bills      | 0.42                       | 0.08, 0.76 |

\*Beta coefficients from fixed effects model.

Supplementary Figures

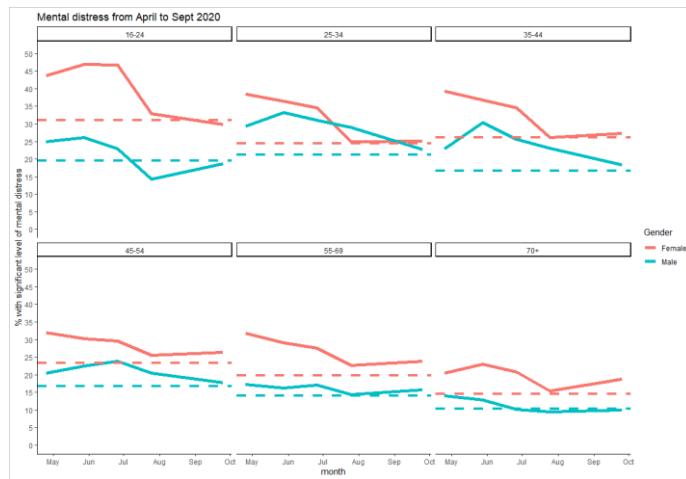

Figure S1: Proportion with significant levels of mental distress (scoring 3 or 4 on 4 or more questions) by age group and gender. The dotted lines represent the pre-pandemic average (from 2018-2019).

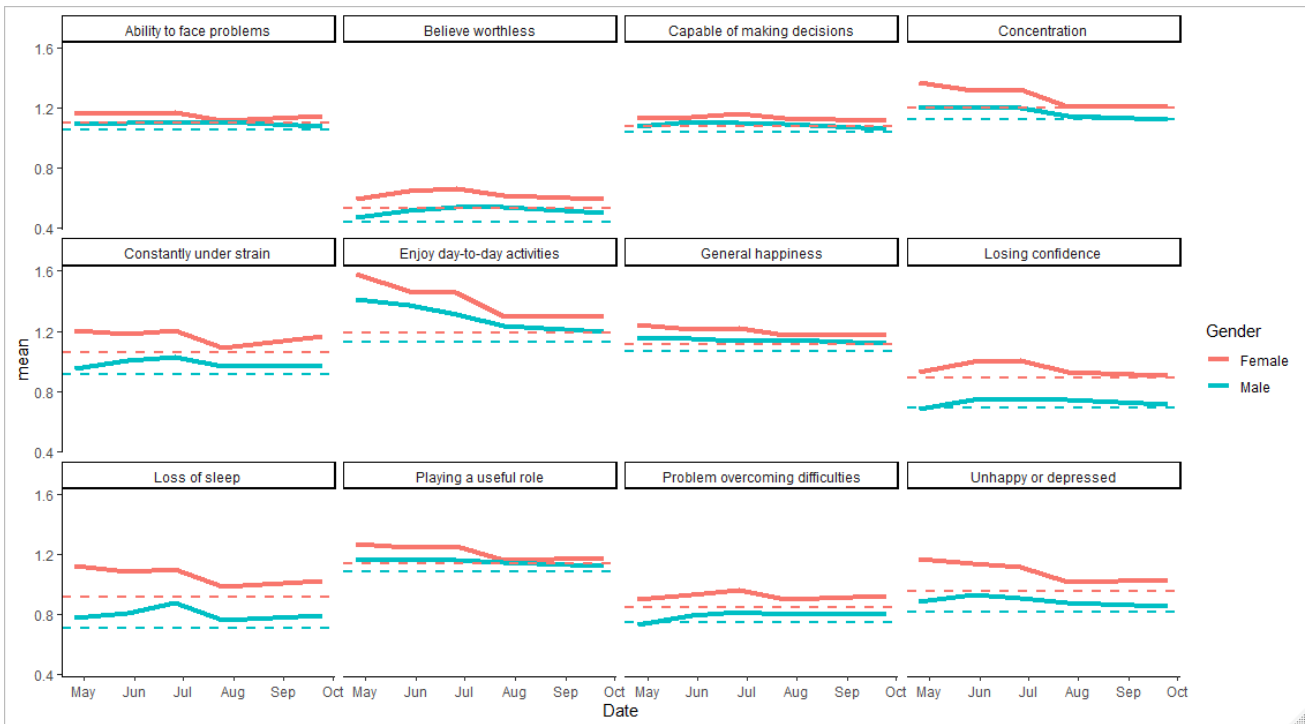

Figure S2: Mean score by specific question on the GHQ-12 (higher = worse) by gender. The dashed lines represent the pre-pandemic average (from 2018-2019).



Figure S3: Sensitivity analysis of trends since the beginning of pandemic after adapting the GHQ-12 removing the question: “Have you recently been able to enjoy your normal day-to-day activities?”

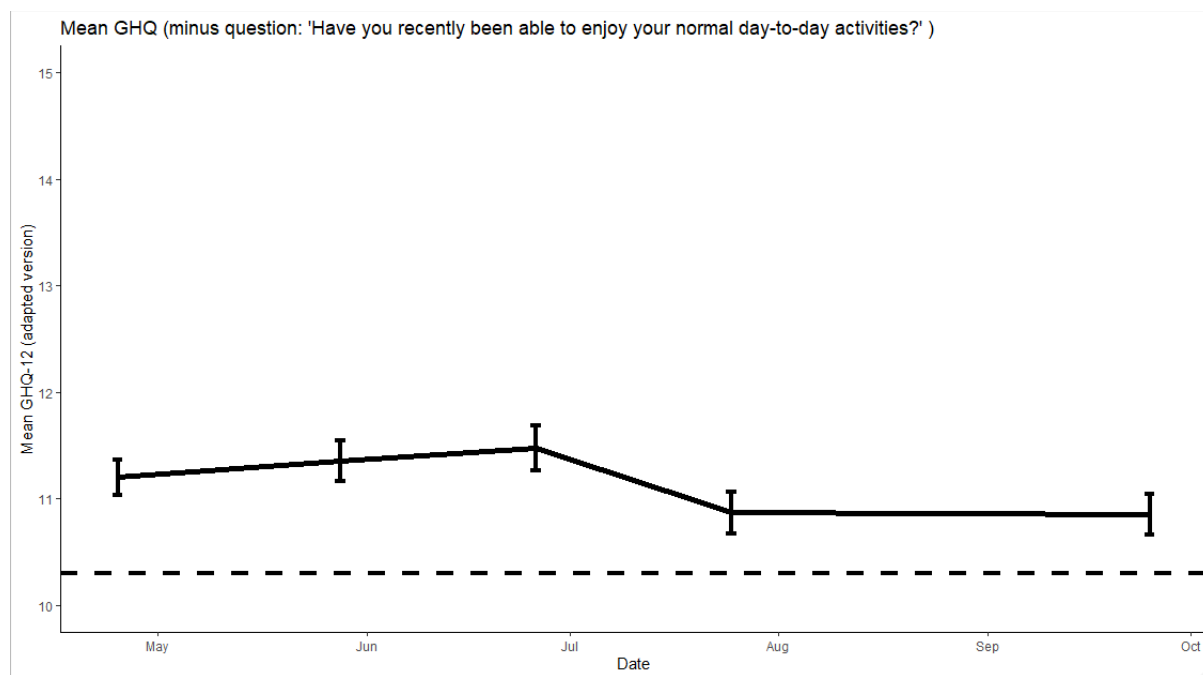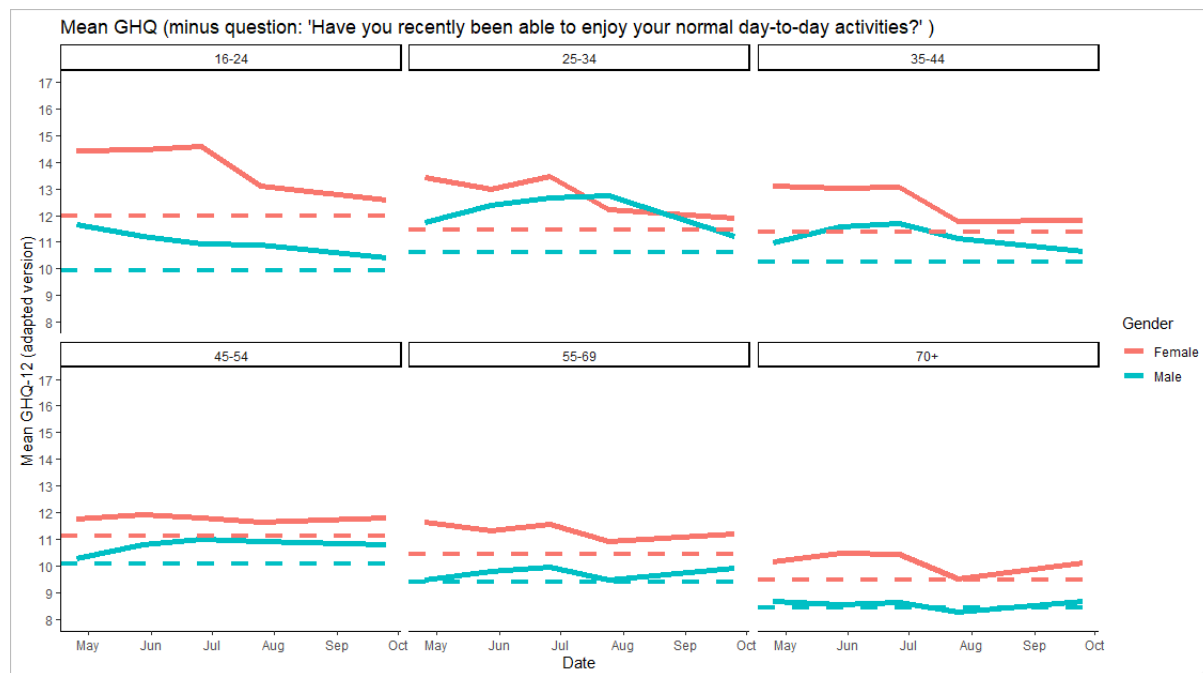

Supplement: mmc1.pdf [file mmc1.pdf]
